# Supplementary material for: BIRC5 promotes cancer progression and predicts prognosis in laryngeal squamous cell carcinoma
Source: PeerJ. 2022 Feb 1;10:e12871. doi: 10.7717/peerj.12871 (PMC8815368; doi:10.7717/peerj.12871)
Supplement: Supplemental Information 4 [file peerj-10-12871-s004.xlsx]

## Sheet: Sheet1
Detailed information of tissue array panel
No.	Age	Sex	Organ/Anatomic Site	Pathology diagnosis	Grade	TNM	Stage	Type	Smoking status	Alcohol abuse
A1	45	M	Larynx	Squamous cell carcinoma	1	T4N0M0	III	Malignant	YES	EVER
A2	64	M	Larynx	Squamous cell carcinoma	1	T4N0M0	III	Malignant	YES	EVER
A3	49	M	Larynx	Squamous cell carcinoma	1	T4N0M0	III	Malignant	YES	EVER
A4	47	M	Larynx	Squamous cell carcinoma	1	T4N0M0	III	Malignant	YES	EVER
A5	64	M	Larynx	Squamous cell carcinoma	1	T4N0M0	III	Malignant	YES	EVER
A6	58	M	Larynx	Squamous cell carcinoma	1	T2N0M0	II	Malignant	YES	EVER
A7	50	M	Larynx	Squamous cell carcinoma	1	T1N0M0	I	Malignant	YES	EVER
A8	61	M	Larynx	Squamous cell carcinoma	1	T2N0M0	II	Malignant	YES	EVER
A9	51	M	Larynx	Squamous cell carcinoma	1	T2N0M0	II	Malignant	YES	EVER
A10	71	M	Larynx	Squamous cell carcinoma	1	T4N1M0	III	Malignant	YES	EVER
B1	65	M	Larynx	Squamous cell carcinoma	1	T4N0M0	III	Malignant	YES	EVER
B2	45	M	Larynx	Squamous cell carcinoma	1	T2N0M0	II	Malignant	YES	EVER
B3	63	M	Larynx	Squamous cell carcinoma	1	T2N0M0	II	Malignant	YES	NEVER
B4	41	M	Larynx	Squamous cell carcinoma	1	T3N0M0	III	Malignant	YES	EVER
B5	72	M	Larynx	Squamous cell carcinoma	1	T1N0M0	I	Malignant	YES	EVER
B6	50	M	Larynx	Squamous cell carcinoma	1	T4N0M0	III	Malignant	YES	EVER
B7	67	M	Larynx	Squamous cell carcinoma	2	T1N0M0	I	Malignant	YES	EVER
B8	68	M	Larynx	Squamous cell carcinoma (proper gland tissue of larynx)	2	T4aN0M0	III	Malignant	YES	EVER
B9	72	M	Larynx	Squamous cell carcinoma	2	T3N0M0	III	Malignant	YES	EVER
B10	59	M	Larynx	Squamous cell carcinoma	2	T4N0M0	III	Malignant	YES	EVER
C1	48	M	Larynx	Squamous cell carcinoma	2	T1N0M0	I	Malignant	YES	EVER
C2	67	M	Larynx	Squamous cell carcinoma (sparse)	2	T4N1M0	III	Malignant	YES	EVER
C3	54	M	Larynx	Squamous cell carcinoma	2	T2N1M0	III	Malignant	YES	EVER
C4	58	M	Larynx	Squamous cell carcinoma	2	T2N0M0	II	Malignant	YES	EVER
C5	71	M	Larynx	Squamous cell carcinoma	1--2	T3N0M0	III	Malignant	YES	EVER
C6	64	M	Larynx	Squamous cell carcinoma	2	T4N1M0	III	Malignant	YES	EVER
C7	70	M	Larynx	Squamous cell carcinoma	3	T3N0M0	III	Malignant	YES	EVER
C8	75	M	Larynx	Squamous cell carcinoma	2	T3N0M0	III	Malignant	YES	EVER
C9	62	M	Larynx	Squamous cell carcinoma	2	T3N0M0	III	Malignant	YES	EVER
C10	63	M	Larynx	Squamous cell carcinoma	2	T3N0M0	III	Malignant	YES	EVER
D1	54	M	Larynx	Squamous cell carcinoma	2	T4N1M0	III	Malignant	YES	EVER
D2	64	M	Larynx	Squamous cell carcinoma	3	T1N0M0	I	Malignant	YES	EVER
D3	68	M	Larynx	Squamous cell carcinoma	2	T3N0M0	III	Malignant	YES	EVER
D4	53	M	Larynx	Squamous cell carcinoma	3	T4N1M0	III	Malignant	YES	EVER
D5	58	M	Larynx	Squamous cell carcinoma	3	T2N0M0	II	Malignant	YES	EVER
D6	72	M	Larynx	Squamous cell carcinoma	3	T2N1M0	III	Malignant	YES	NEVER
D7	73	F	Larynx	Squamous cell carcinoma	3	T3N0M0	III	Malignant	NO	NEVER
D8	47	M	Larynx	Squamous cell carcinoma (proper gland tissue of larynx)	3	T1N0M1	I	Malignant	YES	EVER
D9	64	M	Larynx	Squamous cell carcinoma	3	T3N0M0	III	Malignant	YES	EVER
D10	47	M	Larynx	Squamous cell carcinoma	3	T2N0M0	II	Malignant	YES	EVER
E1	37	F	Larynx	Metastatic squamous cell carcinoma	3	T4N1M0	III	Malignant	YES	EVER
E2	40	M	Larynx	Metastatic squamous cell carcinoma	3	T3N3M0	II	Malignant	YES	EVER
E3	41	M	Lymph node	Metastatic squamous cell carcinoma of No. 14	2	T4N0M1	II	Metastasis	YES	EVER
E4	54	M	Lymph node	Metastatic squamous cell carcinoma of No. 31	2	T2N3M1	II	Metastasis	YES	EVER
E5	64	M	Lymph node	Metastatic squamous cell carcinoma	2	T2N4M0	III	Metastasis	YES	EVER
E6	49	M	Lymph node	Metastatic squamous cell carcinoma	2	T4N3M1	III	Metastasis	YES	EVER
E7	56	M	Lymph node	Metastatic squamous cell carcinoma with necrosis	2	T4N1M0	III	Metastasis	YES	EVER
E8	69	F	Lymph node	Metastatic squamous cell carcinoma with necrosis	1	T3N4M0	II	Metastasis	YES	EVER
E9	69	M	Lymph node	Metastatic squamous cell carcinoma	3	T2N3M0	III	Metastasis	YES	EVER
E10	52	F	Lymph node	Metastatic squamous cell carcinoma (lymph node tissue)	4	T3N4M0	II	Metastasis	NO	NEVER
F1	55	M	Lymph node	Metastatic squamous cell carcinoma (sparse)	2	T3N0M0	III	Metastasis	YES	EVER
F2	52	F	Lymph node	Metastatic squamous cell carcinoma	2	T4N1M0	III	Metastasis	YES	EVER
F3	64	M	Larynx	Hyperplasia (chronic inflammation of fibrous tissue)	4	T2N1M0	II	Hyperplasia	YES	EVER
F4	68	M	Larynx	Metastatic squamous cell carcinoma	4	T4N0M0	II	Hyperplasia	YES	EVER
F5	47	M	Larynx	Metastatic squamous cell carcinoma	3	T2N0M0	II	Metastasis	YES	EVER
F6	70	M	Larynx	Metastatic squamous cell carcinoma	3	T1N0M0	I	Metastasis	YES	EVER
F7	57	F	Larynx	Metastatic squamous cell carcinoma	3	T1N0M0	I	Metastasis	NO	NEVER
F8	64	M	Larynx	Metastatic squamous cell carcinoma	3	T2N0M0	II	Metastasis	YES	EVER
F9	40	M	Larynx	Metastatic squamous cell carcinoma	3	T1N0M0	II	Metastasis	YES	EVER
F10	77	M	Larynx	Metastatic squamous cell carcinoma	3	T2N0M0	II	Metastasis	YES	EVER
G1	47	M	Larynx	Metastatic squamous cell carcinoma	3	T1N0M0	II	Metastasis	YES	EVER
G2	44	F	Larynx	Metastatic squamous cell carcinoma	3	T2N0M0	II	Metastasis	NO	NEVER
G3	66	M	Larynx	Metastatic squamous cell carcinoma	3	T3N1M0	II	Metastasis	YES	EVER
G4	62	M	Larynx	Metastatic squamous cell carcinoma	3	T2N0M0	II	Metastasis	YES	EVER
G5	57	M	Larynx	Metastatic squamous cell carcinoma	3	T4N0M0	I	Metastasis	YES	EVER
G6	74	M	Larynx	Metastatic squamous cell carcinoma	3	T4N0M0	II	Metastasis	YES	EVER
G7	63	M	Larynx	Metastatic squamous cell carcinoma	3	T2N0M0	II	Metastasis	YES	EVER
G8	59	M	Larynx	Squamous cell carcinoma	4	T3N0M0	II	Malignant	YES	EVER
G9	64	M	Larynx	Squamous cell carcinoma	4	T2N0M0	II	Malignant	YES	EVER
G10	65	M	Larynx	Squamous cell carcinoma	4	T4N0M0	II	Malignant	YES	EVER
H1	51	F	Larynx	Squamous cell carcinoma	3	T1N0M0	II	Malignant	NO	NEVER
H2	63	M	Larynx	Squamous cell carcinoma	4	T2N0M0	II	Malignant	YES	NEVER
H3	42	F	Larynx	Squamous cell carcinoma	4	T1N1M0	II	Malignant	NO	NEVER
H4	37	M	Larynx	Squamous cell carcinoma	4	T4N0M0	II	Malignant	YES	NEVER
H5	21	F	Larynx	Squamous cell carcinoma	4	T2N0M0	II	Malignant	NO	EVER
H6	15	F	Larynx	Squamous cell carcinoma	3	T3N0M0	II	Malignant	NO	NEVER
H7	45	M	Larynx	Squamous cell carcinoma	3	T4N0M0	II	Malignant	YES	EVER
H8	16	M	Larynx	Squamous cell carcinoma	4	T4N0M0	II	Malignant	YES	EVER
H9	43	M	Larynx	Squamous cell carcinoma	4	T2N0M0	II	Malignant	YES	EVER
H10	18	F	Larynx	Squamous cell carcinoma	4	T4N0M0	II	Malignant	NO	NEVER
I1	58	M	Larynx	Metastatic squamous cell carcinoma	1	T1N0M0	I	Metastasis	YES	EVER
I2	42	F	Larynx	Metastatic squamous cell carcinoma	1	T4N3M0	I	Metastasis	YES	EVER
I3	48	M	Larynx	Metastatic squamous cell carcinoma	1	T1N0M0	I	Metastasis	YES	EVER
I4	39	M	Larynx	Metastatic squamous cell carcinoma	1	T1N0M0	I	Metastasis	NO	NEVER
I5	42	M	Larynx	Metastatic squamous cell carcinoma	1	T1N0M0	III	Metastasis	YES	EVER
I6	60	M	Larynx	Metastatic squamous cell carcinoma	3	T3N0M0	II	Metastasis	YES	EVER
I7	47	F	Larynx	Metastatic squamous cell carcinoma	3	T2N0M0	II	Metastasis	YES	EVER
